# Supplementary material
Source: publisher figshare collection journal article supplement (https://acs.figshare.com/ndownloader/files/13440434)
Supplement: Supplementary file 1 [file 13440434]

# Phase transition of 2D $\beta$ -Ga<sub>2</sub>O<sub>3</sub> Nanosheets from Ultrathin $\gamma$ -Ga<sub>2</sub>O<sub>3</sub> Nanosheets and Their Photocatalytic Hydrogen Evolution Activities

*Xiaoyan Zhang<sup>a,\*</sup>, Huijuan Huang<sup>b</sup>, Yingguang Zhang<sup>b</sup>, Dan Liu<sup>b</sup>, Na Tong<sup>b</sup>, Jinjin Lin<sup>b</sup>, Lu Chen<sup>b</sup>, Zizhong Zhang<sup>b</sup> and Xuxu Wang<sup>b,\*</sup>*

<sup>a</sup>College of Chemical Engineering and Materials Science, Quanzhou Normal University, Quanzhou, 362000, Fujian Province, P. R. China.

<sup>b</sup>State Key Laboratory of Photocatalysis on Energy and Environment, College of Chemistry, Fuzhou University, Fuzhou, 350002, P. R. China.

E-mail: xzhang@qztc.edu.cn; xwang@fzu.edu.cn

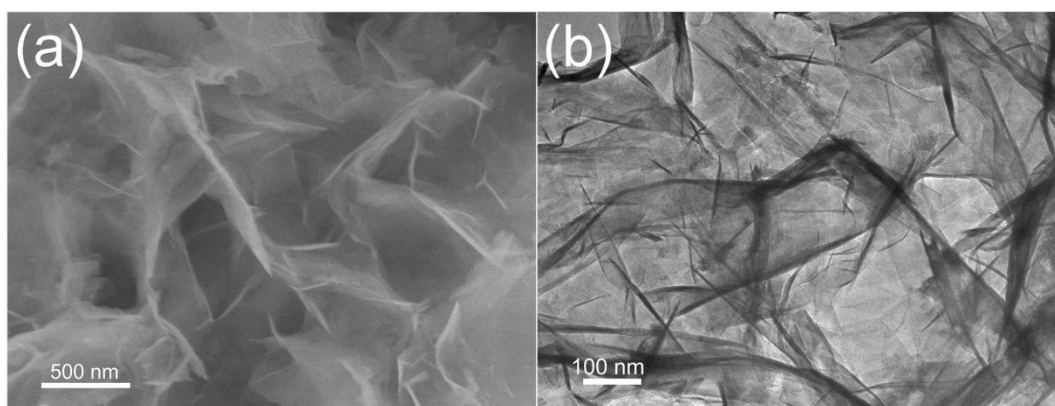

**Figure S1.** (a) SEM, (b) TEM images of  $\gamma$ -Ga<sub>2</sub>O<sub>3</sub> nanosheets.

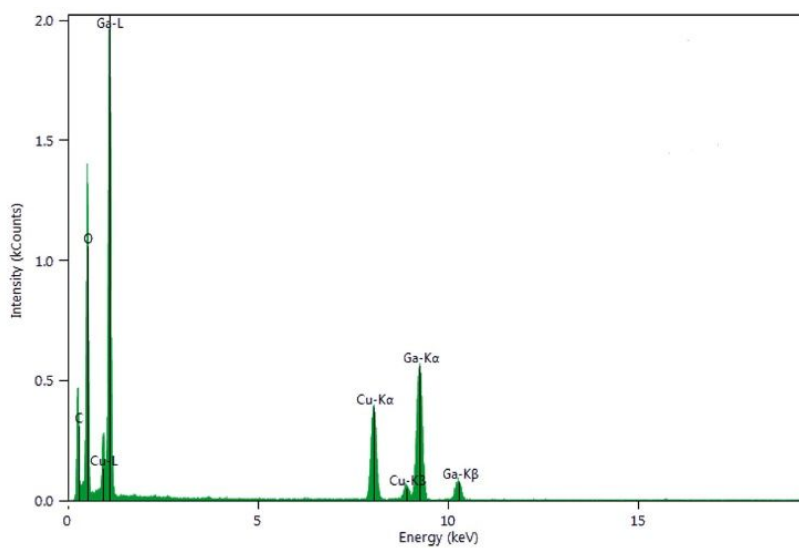

**Figure S2.** EDX spectroscopy of  $\beta$ -Ga<sub>2</sub>O<sub>3</sub> nanosheets.

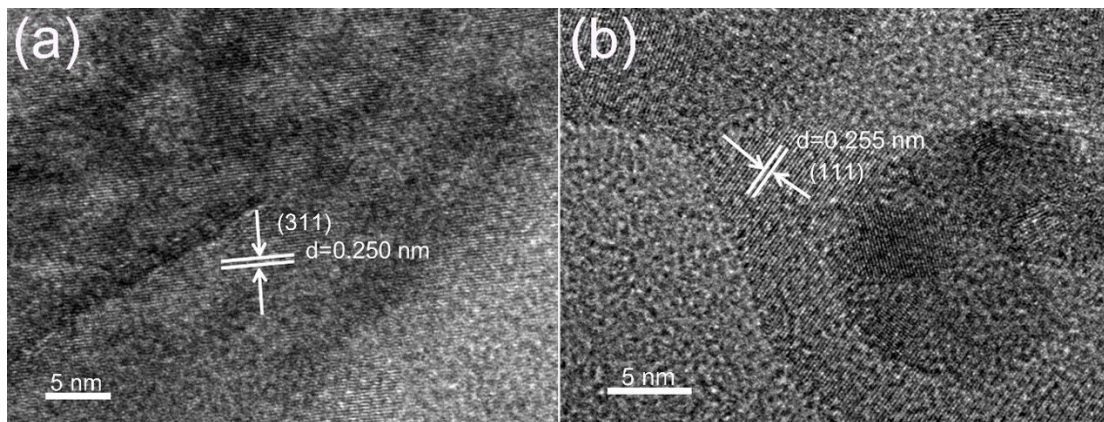

**Figure S3.** HRTEM images of  $\gamma$ -Ga<sub>2</sub>O<sub>3</sub> (a) and  $\beta$ -Ga<sub>2</sub>O<sub>3</sub> nanosheets (b).

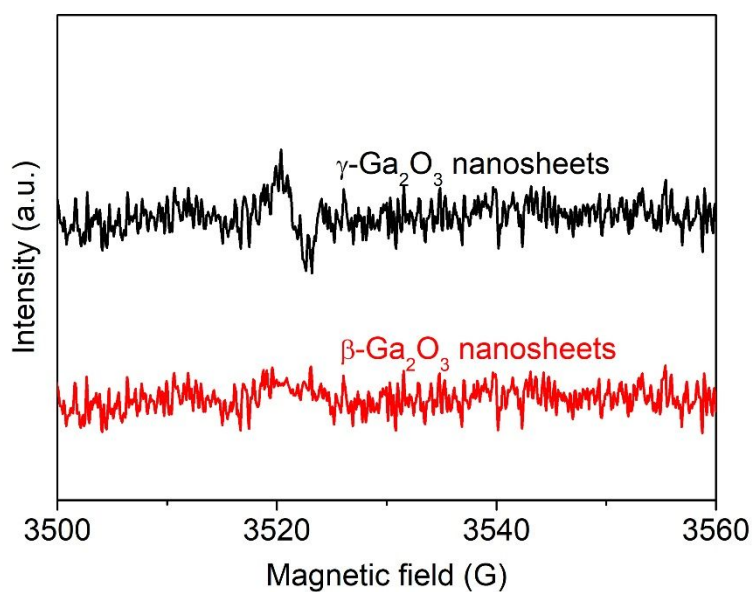

**Figure S4.** The electron spin resonance spectra of  $\gamma\text{-Ga}_2\text{O}_3$  and  $\beta\text{-Ga}_2\text{O}_3$  nanosheets.

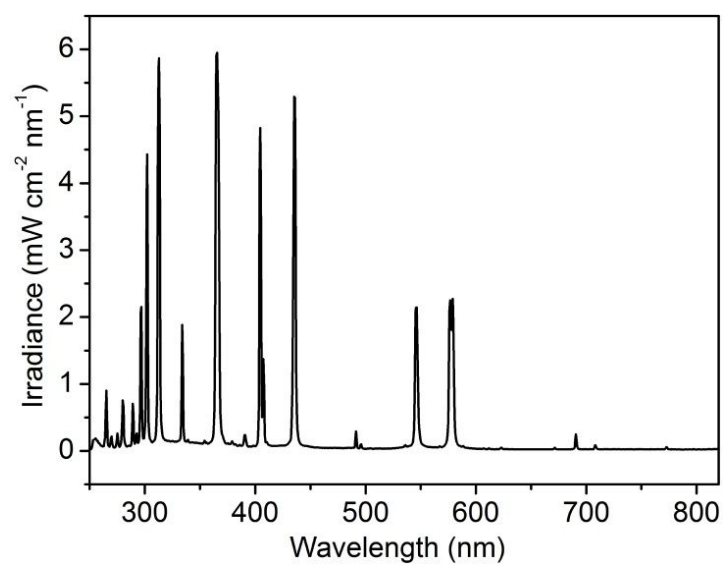

**Figure S5.** The irradiance spectrum of the high-voltage mercury lamp with 125 W.
